# Supplementary material
Source: PubMed Central journal article supplement (PMC7984863)
Supplement: mmc1.pdf [file mmc1.pdf]

# THE LANCET

## Supplementary appendix

This appendix formed part of the original submission. We post it as supplied by the authors.

Supplement to: White NJ, Strub-Wourgaft N, Faiz A, Guerin PJ. Guidelines should not pool evidence from uncomplicated and severe COVID-19. *Lancet* 2021; published online March 22. [http://dx.doi.org/10.1016/S0140-6736\(21\)00469-4](http://dx.doi.org/10.1016/S0140-6736(21)00469-4).

Guidelines should not pool evidence from uncomplicated and severe COVID-19. \*Nicholas J White, Nathalie Strub-Wourgaft, Abul Faiz, Philippe J Guerin

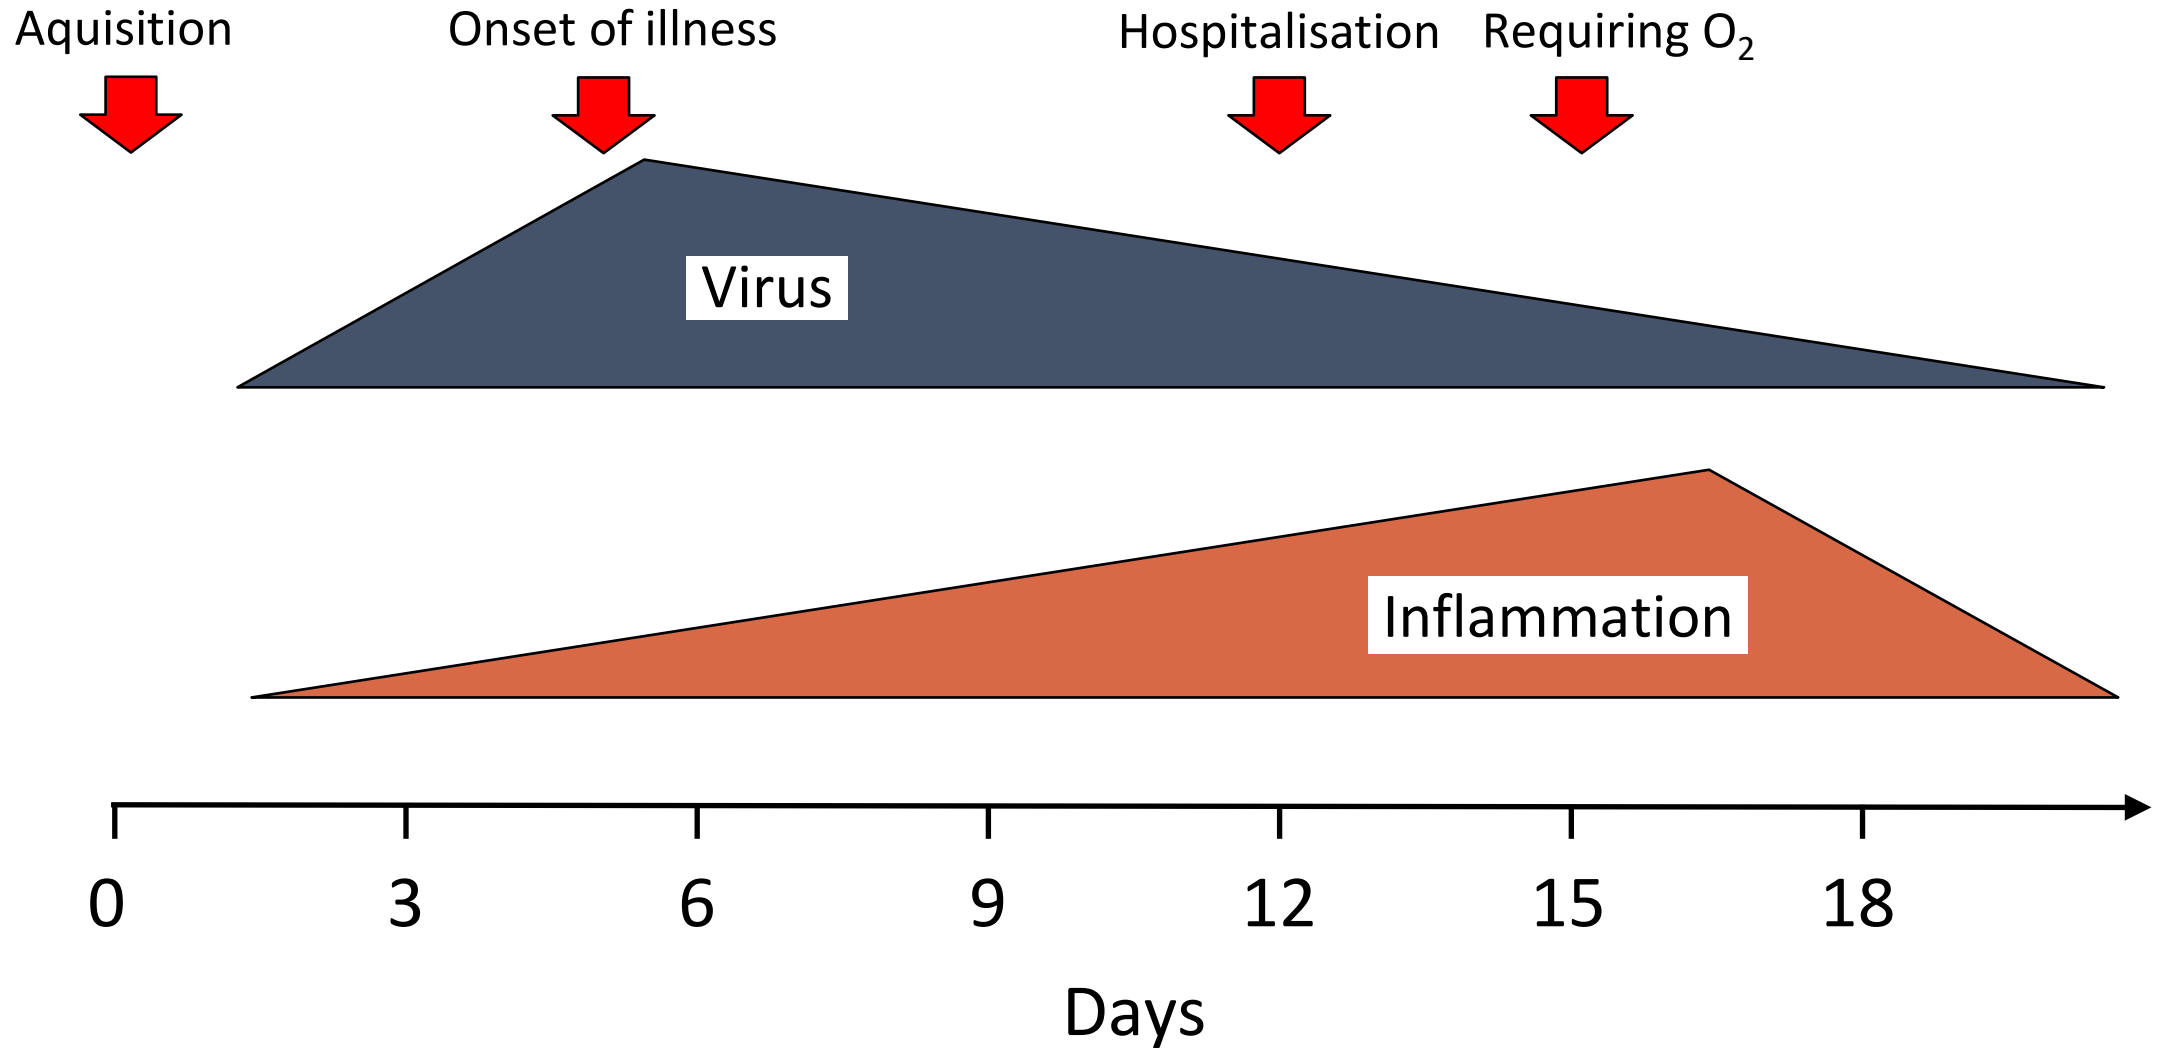

**Figure:** Approximate sequence of pathological events in COVID-19 infection. Viral burdens peak early, and so antiviral drugs would be expected to provide greatest benefits in early illness, whereas in hospitalized patients, particularly those requiring respiratory support, inflammatory processes dominate and anti-inflammatories or immunomodulators may be beneficial.
